# Supplementary material for: Environmental Factors Affecting Freshwater Snail Intermediate Hosts in Shenzhen and Adjacent Region, South China
Source: MDPI journal article supplement (doi:10.3390/tropicalmed7120426), 2022-12-09
Supplement: s1 [file s1]

## Supplementary Materials: Overview of importance of the different input variables used in the decision tree models to model the presence or absence of *Biomphalaria straminea*, *Sinotaia quadrata* and *Physella acuta*, respectively (DOCX)

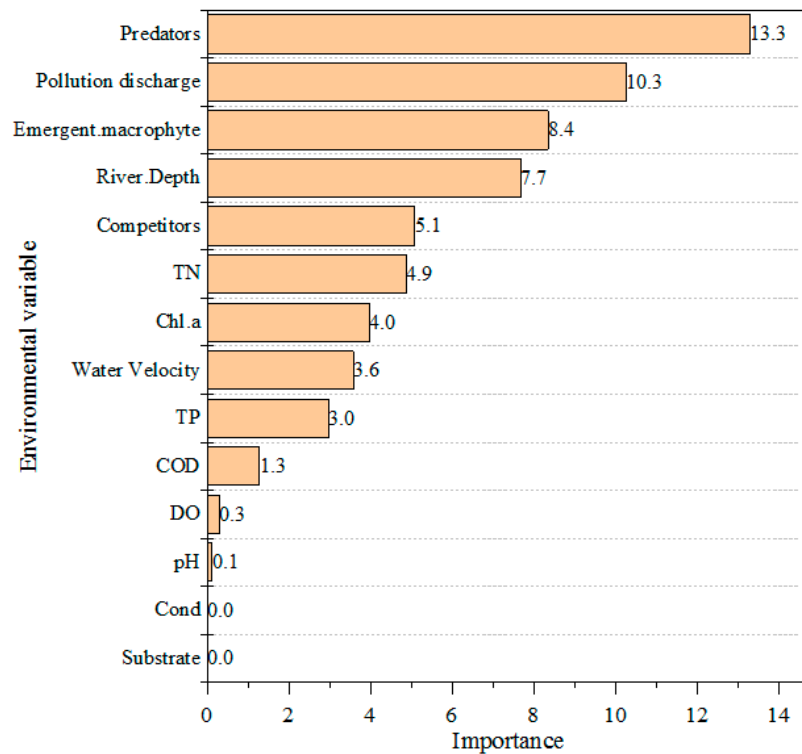

**Figure S1.** Overview of importance of the different input variables used in the decision tree models to model the presence or absence of *Biomphalaria straminea*.

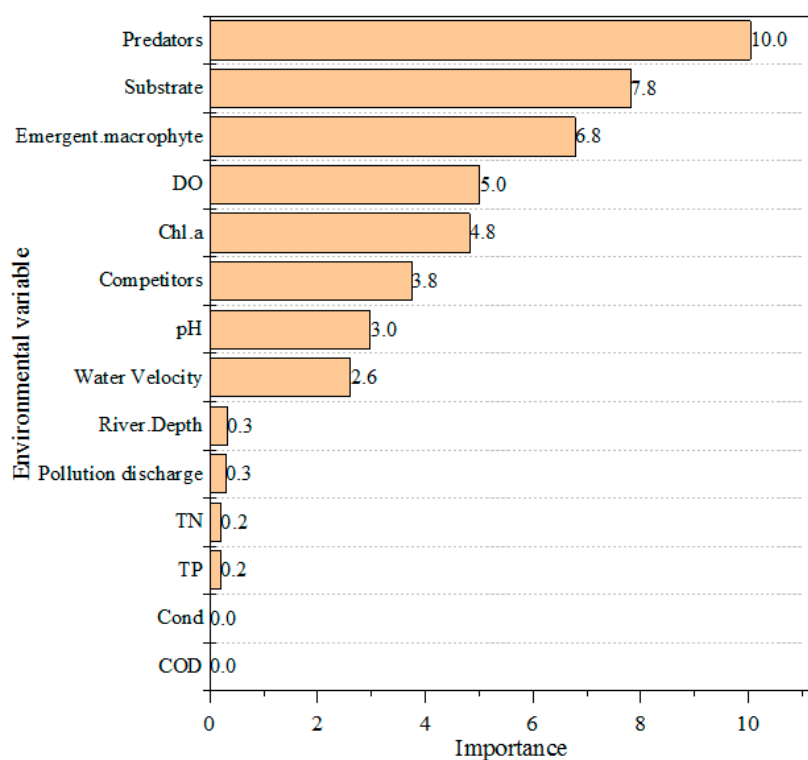

**Figure S2.** Overview of importance of the different input variables used in the decision tree models to model the presence or absence of *Sinotaia quadrata*.

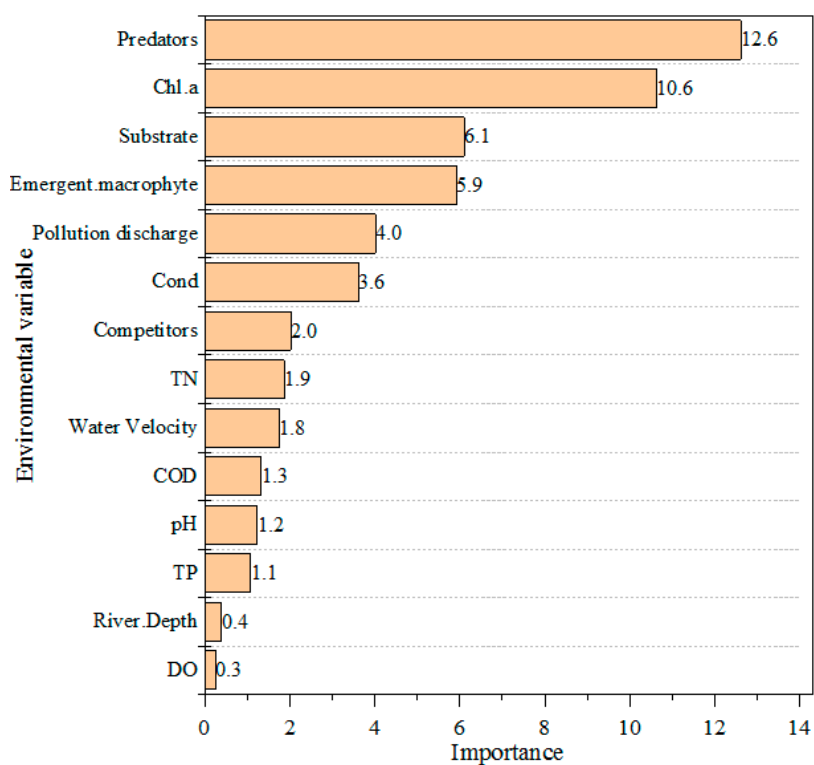

**Figure S3.** Overview of importance of the different input variables used in the decision tree models to model the presence or absence of *Physella acuta*.
