# Supplementary material for: Environmental Factors Affecting Freshwater Snail Intermediate Hosts in Shenzhen and Adjacent Region, South China
Source: Trop Med Infect Dis. 2022 Dec 9;7(12):426. doi: 10.3390/tropicalmed7120426 (PMC9782201; doi:10.3390/tropicalmed7120426)
Supplement: Supplementary file 1 [file tropicalmed-07-00426-s001.zip › Table S1. Investigated sites are shown.xlsx]

## Sheet: Sheet1
Number	Locations	District1	District2	Longitude (E)	Latitude (N)	Bank slope	Species of snails
1	Xixiang River	Shenzhen	Baoan	113.878	22.5969	Flinty slope	B. straminea, S. cancellata, S. quadrata, S. libertina
2	Xixiang River	Shenzhen	Baoan	113.88	22.5719	Flinty slope	B. straminea, S. cancellata, S. libertina
3	Xixiang River	Shenzhen	Baoan	113.86	22.5519	Flinty slope	NA
4	Xinzhen River	Shenzhen	Baoan	113.907	22.5713	Flinty slope	NA
5	Xinzhen River	Shenzhen	Baoan	113.904	22.5652	Flinty slope	P. canaliculata, P. acuta
6	Xinzhen River	Shenzhen	Baoan	113.896	22.5541	Flinty slope	B. straminea
7	Xinzhen River	Shenzhen	Baoan	113.888	22.5476	Flinty slope	NA
8	Dasha River	Shenzhen	Nanshan	113.982	22.594	Flinty slope	R. auricularia, S. quadrata
9	Dasha River	Shenzhen	Nanshan	113.965	22.5929	Flinty slope	R. auricularia, P. canaliculata, S. quadrata
10	Dasha River	Shenzhen	Nanshan	113.955	22.5845	Flinty slope	S. quadrata, P. acuta, S. cancellata, P. canaliculata
11	Dasha River	Shenzhen	Nanshan	113.953	22.5679	Flinty slope	S. limnophila, S. cancellata, S. libertina, P. canaliculata,B. straminea, R. auricularia
12	Dasha River	Shenzhen	Nanshan	113.955	22.544	Flinty slope	S. libertina, B. straminea
13	Dasha River	Shenzhen	Nanshan	113.95	22.5224	Flinty slope	NA
14	Shawan River	Shenzhen	Luohu	114.156	22.6103	Natural slope	S. cancellata, S. libertina
15	Shawan River	Shenzhen	Luohu	114.151	22.5898	Natural slope	S. quadrata
16	Shawan River	Shenzhen	Luohu	114.142	22.5756	Natural slope	NA
17	Shawan River	Shenzhen	Luohu	114.144	22.5573	Natural slope	B. straminea, S. quadrata, P. canaliculata, P. acuta
18	Shawan River	Shenzhen	Luohu	114.142	22.5491	Natural slope	S. quadrata, S. limnophila, R. auricularia, S. cancellata, P. canaliculata
19	Yantian River	Shenzhen	Yantian	114.242	22.6029	Flinty slope	B. straminea, R. auricularia, S. libertina
20	Yantian River	Shenzhen	Yantian	114.25	22.5955	Flinty slope	B. straminea, S. cancellata, R. auricularia
21	Yantian River	Shenzhen	Yantian	114.259	22.5905	Flinty slope	S. cancellata, R. auricularia, S. libertina
22	Yantian River	Shenzhen	Yantian	114.269	22.5877	Flinty slope	NA
23	Kuicong River	Shenzhen	Dapeng	114.413	22.6319	Flinty slope	B. straminea, S. quadrata, R. auricularia, S. cancellata, S. libertina
24	Kuicong River	Shenzhen	Dapeng	114.426	22.6277	Flinty slope	B. straminea, S. quadrata, S. limnophila, S. cancellata, S. libertina, P. canaliculata
25	Kuicong River	Shenzhen	Dapeng	114.419	22.6227	Flinty slope	B. straminea, P. acuta, C. chinensis
26	Kuicong River	Shenzhen	Dapeng	114.414	22.614	Flinty slope	NA
27	Wangmu River	Shenzhen	Dapeng	114.468	22.5984	Flinty slope	S. cancellata, S. libertina
28	Wangmu River	Shenzhen	Dapeng	114.479	22.5867	Flinty slope	B. straminea, S. quadrata
29	Wangmu River	Shenzhen	Dapeng	114.487	22.5758	Flinty slope	S. cancellata, S. libertina
30	Wangmu River	Shenzhen	Dapeng	114.499	22.5675	Flinty slope	NA
31	Guanlan River	Shenzhen	Loanghua	114.038	22.6579	Flinty slope	R. auricularia
32	Guanlan River	Shenzhen	Loanghua	114.04	22.672	Flinty slope	P. acuta
33	Guanlan River	Shenzhen	Loanghua	114.04	22.6896	Flinty slope	NA
34	Guanlan River	Shenzhen	Loanghua	114.041	22.7014	Flinty slope	NA
35	Guanlan River	Shenzhen	Loanghua	114.042	22.713	Flinty slope	NA
36	Guanlan River	Shenzhen	Loanghua	114.046	22.7191	Flinty slope	B. straminea, R. auricularia
37	Guanlan River	Shenzhen	Loanghua	114.048	22.7262	Flinty slope	S. quadrata
38	Guanlan River	Shenzhen	Loanghua	114.054	22.7319	Flinty slope	R. auricularia
39	Guanlan River	Shenzhen	Loanghua	114.055	22.7486	Flinty slope	NA
40	Baihua River	Shenzhen	Loanghua	114.041	22.7496	Natural slope	B. straminea
41	Baihua River	Shenzhen	Loanghua	114.047	22.7473	Natural slope	R. auricularia, S. cancellata, S. libertina
42	Shima River	Dongguan	Tangxia	114.068	114.068	Natural slope	NA
43	Shima River	Dongguan	Tangxia	114.098	22.8083	Natural slope	NA
44	Shima River	Dongguan	Tangxia	114.111	22.8321	Natural slope	NA
45	Shima River	Dongguan	Zhangmutou	114.124	22.8526	Natural slope	P. acuta
46	Shima River	Dongguan	Zhangmutou	114.105	22.8734	Natural slope	B. straminea
47	Shima River	Dongguan	Zhangmutou	114.076	22.8934	Natural slope	P. acuta
48	Shima River	Dongguan	Zhangmutou	114.074	22.9132	Natural slope	B. straminea
49	Shima River	Dongguan	Changping	114.067	22.9367	Natural slope	NA
50	Shima River	Dongguan	Changping	114.062	22.949	Natural slope	B. straminea
51	Shima River	Dongguan	Changping	114.068	22.9724	Natural slope	B. straminea, P. acuta
52	Shima River	Dongguan	Qiaotou	114.081	22.9838	Natural slope	P. acuta
53	Shima River	Dongguan	Qiaotou	114.1	22.9979	Natural slope	B. straminea, P. acuta
54	Shima River	Dongguan	Qiaotou	114.108	23.0394	Natural slope	B. straminea
55	Yantianshui River	Dongguan	Tangxia	114.122	22.7767	Natural slope	S. quadrata
56	Yantianshui River	Dongguan	Tangxia	114.108	22.7947	Natural slope	S. quadrata
57	Xiani River	Dongguan	Tangxia	114.126	22.8255	Flinty slope	NA
58	Guancang River	Dongguan	Zhangmutou	114.117	22.9281	Flinty slope	B. straminea, P. acuta
59	Guancang River	Dongguan	Zhangmutou	114.106	22.928	Flinty slope	B. straminea, P. acuta
60	Guancang River	Dongguan	Zhangmutou	114.094	22.9207	Flinty slope	NA
61	Tonghu River	Dongguan	Xiegang	114.123	22.9923	Natural slope	NA
62	Dongjiang river	Dongguan	Qishi	114.087	23.0731	Natural slope	B. straminea, P. acuta
63	Dongjiang river	Dongguan	Qishi	114.064	23.0995	Natural slope	C. chinensis
64	Dongjiang river	Dongguan	Qishi	114.037	23.0935	Natural slope	R. auricularia
65	Dongjiang river	Dongguan	Qishi	114.002	23.0855	Natural slope	P. acuta
66	Dongjiang river	Huizhou	Huicheng	114.339	23.1319	Flinty slope	NA
67	Dongjiang river	Huizhou	Huicheng	114.364	23.1412	Flinty slope	NA
68	Dongjiang river	Huizhou	Huicheng	114.393	23.1135	Flinty slope	NA
69	Dongjiang river	Huizhou	Huicheng	114.429	23.1014	Flinty slope	NA
70	Sha River	Huizhou	Boluo	114.089	23.1916	Natural slope	C. chinensis
71	Xizhijiang River	Huizhou	Huicheng	114.44	23.0696	Natural slope	S. limnophila, P. canaliculata
72	Xizhijiang River	Huizhou	Huicheng	114.461	23.0468	Natural slope	S. quadrata, C. chinensis
73	Xizhijiang River	Huizhou	Huicheng	114.471	23.0242	Natural slope	B. straminea
74	Danshui River	Huizhou	Huicheng	114.491	22.9989	Natural slope	S. quadrata, B. straminea
75	Danshui River	Huizhou	Huiyang	114.499	22.9745	Natural slope	S. quadrata, S. limnophila, R. auricularia
76	Danshui River	Huizhou	Huiyang	114.493	22.9438	Natural slope	S. quadrata, S. limnophila, P. acuta, B. straminea
77	Danshui River	Huizhou	Huiyang	114.485	22.9112	Natural slope	P. acuta
78	Danshui River	Huizhou	Huiyang	114.483	22.8834	Natural slope	S. limnophila
79	Danshui River	Huizhou	Huiyang	114.477	22.8664	Natural slope	NA
80	Danshui River	Huizhou	Huiyang	114.46	22.8592	Natural slope	S. quadrata
81	Danshui River	Huizhou	Huiyang	114.468	22.8312	Natural slope	S. quadrata
82	Danshui River	Huizhou	Huiyang	114.467	22.8117	Natural slope	NA
83	Danshui River	Huizhou	Huiyang	114.452	22.801	Natural slope	NA
84	Danshui River	Huizhou	Huiyang	114.419	22.7806	Natural slope	NA
85	Danshui River	Huizhou	Huiyang	114.383	22.7808	Natural slope	S. quadrata
86	Longgang River	Shenzhen	Longgang	114.338	22.7676	Natural slope	S. cancellata, B. straminea, P. acuta
87	Longgang River	Shenzhen	Longgang	114.302	22.7602	Natural slope	S. quadrata
88	Longgang River	Shenzhen	Longgang	114.274	22.7411	Flinty slope	S. quadrata, B. straminea, P. acuta
89	Longgang River	Shenzhen	Longgang	114.247	22.7192	Flinty slope	NA
90	Longgang River	Shenzhen	Longgang	114.233	22.692	Flinty slope	NA
91	Pingshan River	Shenzhen	Pingshan	114.341	22.6972	Flinty slope	B. straminea, P. acuta
92	Pingshan River	Shenzhen	Pingshan	114.393	22.7079	Natural slope	B. straminea, P. canaliculata
93	Pingshan River	Shenzhen	Huiyang	114.415	22.7228	Natural slope	B. straminea, P. acuta
94	Pingshan River	Shenzhen	Huiyang	114.44	22.7449	Natural slope	P. acuta, S. cancellata
95	Pingshan River	Shenzhen	Huiyang	114.441	22.7667	Natural slope	NA
96	Danao River	Huizhou	Huiyang	114.489	22.7605	Flinty slope	NA
97	Danao River	Huizhou	Huiyang	114.476	22.7815	Flinty slope	NA
98	Wutongshan River	Shenzhen	Longgang	114.212	22.6299	Flinty slope	S. quadrata, B. straminea, P. acuta
99	Longxi River	Shenzhen	Longgang	114.251	22.747	Flinty slope	S. quadrata
100	Maxi River	Huizhou	Huiyang	114.475	22.9475	Flinty slope	S. quadrata
101	Hengling River	Huizhou	Huiyang	114.415	22.8044	Flinty slope	S. quadrata
102	Hengling River	Huizhou	Huiyang	114.399	22.8181	Flinty slope	P. acuta
